# Supplementary material for: Patient-reported burden of myasthenia gravis: baseline results of the international prospective, observational, longitudinal real-world digital study MyRealWorld-MG
Source: HighWire-hosted journal article supplement (doi:10.1136/bmjopen-2022-066445), 2023-01-01
Supplement: bmjopen-2022-066445supp001_data_supplement.pdf [file bmjopen-2022-066445supp001_data_supplement.pdf]

## SUPPLEMENTAL MATERIAL

Table S1. Distribution across the domains of the MG-QoL15r

| Domains                                                                            | All patients<br>N=679 | MGFA I<br>N=93 | MGFA II<br>N=187 | MGFA III<br>N=244 | MGFA IV<br>N=102 |
|------------------------------------------------------------------------------------|-----------------------|----------------|------------------|-------------------|------------------|
| <b>I feel frustrated</b>                                                           |                       |                |                  |                   |                  |
| Not at all                                                                         | 25%                   | 54.9%          | 29.4%            | 15.4%             | 9.9%             |
| Somewhat                                                                           | 54%                   | 38.5%          | 60.4%            | 55.4%             | 55.4%            |
| Very Much                                                                          | 21%                   | 6.6%           | 10.2%            | 29.2%             | 34.7%            |
| <b>I have trouble using my eyes (e.g. double vision)</b>                           |                       |                |                  |                   |                  |
| Not at all                                                                         | 35%                   | 41.8%          | 37.4%            | 31.3%             | 23.8%            |
| Somewhat                                                                           | 45.7%                 | 37.4%          | 44.4%            | 50%               | 52.5%            |
| Very Much                                                                          | 19.4%                 | 20.9%          | 18.2%            | 18.8%             | 23.8%            |
| <b>I have trouble eating</b>                                                       |                       |                |                  |                   |                  |
| Not at all                                                                         | 54.5%                 | 91.2%          | 65.8%            | 42.1%             | 27.7%            |
| Somewhat                                                                           | 41.1%                 | 8.8%           | 32.1%            | 54.6%             | 59.4%            |
| Very Much                                                                          | 4.5%                  | 0%             | 2.1%             | 3.3%              | 12.9%            |
| <b>I have limited my social activity</b>                                           |                       |                |                  |                   |                  |
| Not at all                                                                         | 34.1%                 | 62.6%          | 41.2%            | 22.9%             | 17.8%            |
| Somewhat                                                                           | 43.5%                 | 33%            | 41.7%            | 50%               | 42.6%            |
| Very Much                                                                          | 22.5%                 | 4.4%           | 17.1%            | 27.1%             | 39.6%            |
| <b>I am limited in my ability to enjoy hobbies and fun activities</b>              |                       |                |                  |                   |                  |
| Not at all                                                                         | 22.5%                 | 54.9%          | 26.7%            | 11.7%             | 5.9%             |
| Somewhat                                                                           | 48.4%                 | 35.2%          | 51.9%            | 53.8%             | 44.6%            |
| Very Much                                                                          | 29.2%                 | 9.9%           | 21.4%            | 34.6%             | 49.5%            |
| <b>I have trouble meeting the needs of my family</b>                               |                       |                |                  |                   |                  |
| Not at all                                                                         | 41.5%                 | 73.6%          | 49.7%            | 29.2%             | 19.8%            |
| Somewhat                                                                           | 43.2%                 | 23.1%          | 43.9%            | 51.3%             | 49.5%            |
| Very Much                                                                          | 15.3%                 | 3.3%           | 6.4%             | 19.6%             | 30.7%            |
| <b>I have to make plans around an illness or condition that I suffer from</b>      |                       |                |                  |                   |                  |
| Not at all                                                                         | 17.9%                 | 44%            | 23.5%            | 7.9%              | 4%               |
| Somewhat                                                                           | 47.2%                 | 46.2%          | 50.8%            | 48.8%             | 40.6%            |
| Very Much                                                                          | 35%                   | 9.9%           | 25.7%            | 43.3%             | 55.4%            |
| <b>I am bothered by limitations in performing my work (including work at home)</b> |                       |                |                  |                   |                  |
| Not at all                                                                         | 19.6%                 | 49.5%          | 22.5%            | 8.8%              | 6.9%             |
| Somewhat                                                                           | 44.6%                 | 39.6%          | 52.9%            | 43.3%             | 38.6%            |
| Very Much                                                                          | 35.7%                 | 11%            | 24.6%            | 47.9%             | 54.5%            |

| Domains                                                                                 | All patients<br>N=679 | MGFA I<br>N=93 | MGFA II<br>N=187 | MGFA III<br>N=244 | MGFA IV<br>N=102 |
|-----------------------------------------------------------------------------------------|-----------------------|----------------|------------------|-------------------|------------------|
| <b>I have difficulty speaking</b>                                                       |                       |                |                  |                   |                  |
| Not at all                                                                              | 58.6%                 | 81.3%          | 71.1%            | 50%               | 32.7%            |
| Somewhat                                                                                | 37.4%                 | 17.6%          | 28.9%            | 46.7%             | 54.5%            |
| Very Much                                                                               | 4%                    | 1.1%           | 0%               | 3.3%              | 12.9%            |
| <b>I have lost some personal independence (e.g. driving, shopping, running errands)</b> |                       |                |                  |                   |                  |
| Not at all                                                                              | 42.6%                 | 69.2%          | 55.6%            | 29.6%             | 20.8%            |
| Somewhat                                                                                | 37.2%                 | 24.2%          | 32.6%            | 47.1%             | 38.6%            |
| Very Much                                                                               | 20.2%                 | 6.6%           | 11.8%            | 23.3%             | 40.6%            |
| <b>I am depressed</b>                                                                   |                       |                |                  |                   |                  |
| Not at all                                                                              | 46.4%                 | 72.5%          | 53.5%            | 40%               | 24.8%            |
| Somewhat                                                                                | 43.9%                 | 24.2%          | 41.2%            | 45.4%             | 63.4%            |
| Very Much                                                                               | 9.7%                  | 3.3%           | 5.3%             | 14.6%             | 11.9%            |
| <b>I have trouble walking</b>                                                           |                       |                |                  |                   |                  |
| Not at all                                                                              | 44.9%                 | 85.7%          | 59.9%            | 27.1%             | 19.8%            |
| Somewhat                                                                                | 45.7%                 | 13.2%          | 38.5%            | 61.7%             | 54.5%            |
| Very Much                                                                               | 9.4%                  | 1.1%           | 1.6%             | 11.3%             | 25.7%            |
| <b>I have trouble getting around public places</b>                                      |                       |                |                  |                   |                  |
| Not at all                                                                              | 51%                   | 83.5%          | 68.4%            | 35.4%             | 27.7%            |
| Somewhat                                                                                | 38%                   | 14.3%          | 28.3%            | 52.5%             | 43.6%            |
| Very Much                                                                               | 11%                   | 2.2%           | 3.2%             | 12.1%             | 28.7%            |
| <b>I feel overwhelmed</b>                                                               |                       |                |                  |                   |                  |
| Not at all                                                                              | 46.3%                 | 73.6%          | 56.1%            | 37.9%             | 21.8%            |
| Somewhat                                                                                | 42.1%                 | 20.9%          | 37.4%            | 46.3%             | 64.4%            |
| Very Much                                                                               | 11.6%                 | 5.5%           | 6.4%             | 15.8%             | 13.9%            |
| <b>I have trouble performing my personal grooming needs</b>                             |                       |                |                  |                   |                  |
| Not at all                                                                              | 64.1%                 | 92.3%          | 75.4%            | 52.9%             | 41.6%            |
| Somewhat                                                                                | 30.4%                 | 7.7%           | 24.1%            | 38.3%             | 48.5%            |
| Very Much                                                                               | 5.5%                  | 0%             | 0.5%             | 8.8%              | 9.9%             |
| <b>MG-QoL-15r total score</b>                                                           |                       |                |                  |                   |                  |
| Mean                                                                                    | 11.7                  | 5.5            | 9.2              | 13.7              | 16.4             |
| SD                                                                                      | 7.1                   | 5.2            | 6.1              | 6.4               | 6.4              |
| Min                                                                                     | 0                     | 0              | 0                | 0                 | 2                |
| Q1                                                                                      | 6                     | 1              | 4                | 9                 | 11               |
| Q3                                                                                      | 17                    | 8              | 13               | 18                | 22               |
| Max                                                                                     | 29                    | 21             | 25               | 29                | 28               |

*MG-QoL15: Myasthenia Gravis Quality of Life 15-item revised scale; MGFA: Myasthenia Gravis Foundation of America. SD: Standard deviation; Min: minimum; Q1: first quartile; Q3: third quartile; Max: maximum.*

**Table S2: Distribution across the domains of the HADS**

| Domains of the HADS           | All patients | MGFA I    | MGFA II   | MGFA III  | MGFA IV   |
|-------------------------------|--------------|-----------|-----------|-----------|-----------|
|                               | N=629        | N=87      | N=184     | N=248     | N=100     |
| <b>Total Anxiety score</b>    |              |           |           |           |           |
| % No anxiety                  | 46.7%        | 66.7%     | 57.1%     | 39.5%     | 30.0%     |
| % Mild anxiety                | 23.9%        | 10.3%     | 22.3%     | 28.2%     | 29.0%     |
| % Moderate anxiety            | 21.0%        | 12.6%     | 15.2%     | 23.8%     | 31.0%     |
| % Severe anxiety              | 8.4%         | 10.3%     | 5.4%      | 8.5%      | 10.0%     |
| Mean Anxiety Score (SD)       | 8.2 (4.3)    | 7.1 (4.4) | 7.2 (4)   | 8.6 (4.2) | 9.5 (4.1) |
| <b>Total Depression score</b> |              |           |           |           |           |
| % No depression               | 57.1%        | 77.0%     | 66.9%     | 47.6%     | 45.0%     |
| % Mild depression             | 24.6%        | 16.1%     | 22.3%     | 29.4%     | 27.0%     |
| % Moderate depression         | 14.0%        | 4.6%      | 8.7%      | 17.7%     | 22.0%     |
| % Severe depression           | 4.3%         | 2.3%      | 2.2%      | 5.2%      | 6.0%      |
| Mean Depression Score (SD)    | 6.9 (4.2)    | 4.8 (4)   | 5.8 (3.9) | 7.7 (3.9) | 8.3 (4.2) |

*HADS: Hospital anxiety and depression scale; MGFA: Myasthenia Gravis Foundation of America. SD: Standard deviation*
